# Supplementary material
Source: publisher figshare collection journal article supplement (https://gsajournals.figshare.com/ndownloader/files/29093517)
Supplement: Supplementary file 1 [file 29093517]

## Sheet: Heatmap
	Heatmap of percentage of homeologous recombination - all individuals / all chromosomes
		Chr1	Chr2	Chr3	Chr4	Chr5	Chr6	Chr7	Chr8	Chr9	Chr10	Average/genotype
	IpaDur2-S2-01	0	0	0.299401	74.375	4.86111	1.44928	0	0.423729	0.343643	0	8.17522
	IpaDur2-S2-02	0	1.19048	0	10.1266	14.7287	1.93237	0.352113	0	0.343643	0	2.86739
	IpaDur2-S2-03	0	0	0.299401	9.43396	4.86111	1.44928	0	0.847458	0.343643	0	1.72349
	IpaDur2-S2-04	0	0	0	28.2051	4.86111	1.93237	0	0	0	0	3.49986
	IpaDur2-S2-05	0	0	0.299401	26.7516	4.86111	1.44928	0	0	0	0	3.33614
	IpaDur2-S2-06	0.478469	0	0.299401	12.1795	4.86111	1.44928	0	0	0	0	1.92677
	IpaDur2-S2-08	0	0	1.82371	9.375	4.86111	20.5	0	0.423729	18.2979	0	5.52814
	IpaDur2-S2-09	0	0	0.3003	53.4591	42.1875	3.38164	0	0.423729	0.343643	0	10.0096
	IpaDur2-S2-10	0	0	0.299401	11.5385	4.86111	31.1828	0	0	0	0	4.78818
	IpaDur2-S2-11	0	0	0.299401	73.75	4.86111	1.44928	0	0.423729	0.343643	0	8.11272
	IpaDur2-S2-12	0	0	0.3003	11.3208	4.8951	1.44928	0	0	0	0	1.79654
	IpaDur2-S2-13	0	0	0.299401	24.2038	4.86111	1.44928	0	0.423729	0	0	3.12373
	IpaDur2-S2-14	0	0	0.299401	47.1698	4.86111	1.44928	0	0.423729	0.343643	0	5.4547
	IpaDur2-S2-15	0	0	0	9.375	4.86111	40.2985	0	0.423729	0.343643	0	5.5302
	IpaDur2-S3-Pl1	0	0	0.299401	10	4.86111	1.44928	0.352113	0.423729	0.343643	0	1.77293
	IpaDur1-S1-Pl1	0	0	0.166667	8.35735	0	0	0	0	0	0	0.852402
	IpaDur1-S1-Pl2	0.228833	0.30581	0.333333	67.4352	0	88.724	0	0.589623	0.184843	0.387597	15.8189
	IpaDur1-S2-Pl1	0	0	0	17.0029	0	0	0	0.117925	0	0	1.71208
	IpaDur1-S2-Pl2	0	0	0	21.3256	0.378788	0	0	0	0	0.193798	2.18982
	IpaDur1-S2-Pl3	0	0	1.66667	20.1729	0	0	96.2963	3.41981	5.36044	0.193798	12.711
	IpaDur1-S3-Pl1	0	0	15.8333	8.06916	0	0	11.1111	0	0	0	3.50136
	IpaDur1-S3-Pl2	0	0.30581	0	7.4928	0	13.0564	11.1111	0	0	0	3.19661
	IpaDur1-S3-Pl3	0	0.30581	2.5	8.06916	0	0	0	0	0	0	1.0875
	IpaDur1-S4-Pl1	0	0	0	34.5821	0	8.01187	0	0	0	0	4.2594
	IpaDur1-S4-Pl2	0	0	0	38.0403	0	0	0	0	0	0	3.80403
	IpaDur1-S4-Pl3	0	0	0	34.8703	0	0	0	0	0	0	3.48703
	IpaDur1-S5-Pl1	0	0	0.166667	23.0548	18.5606	0	64.8148	0	0	0.387597	10.6984
	IpaDur1-S5-Pl2	0	6.42202	0	8.06916	0	40.0593	46.2963	7.66509	0	0	10.8512
	IpaDur1-S5-Pl3	0	0	17.5	16.1383	18.5606	85.1632	1.85185	0.235849	0	0.581395	14.0031
	IpaDur1-S6-Pl1	0	0	1.66667	100	32.9545	0	14.8148	0	0	0	14.9436
	IpaDur1-S6-Pl2	0	0	0	100	53.0303	21.6617	0	0	0	0.193798	17.4886
	IpaDur1-S6-Pl3	0	0	9.33333	100	68.1818	0	0	0	0	0.193798	17.7709
	IpaDur1-S9-Pl1	0	28.1346	0	100	0	27.003	0	0	0	0	15.5138
	IpaDur1-S9-Pl2	0.228833	33.3333	0	100	0	27.003	0	1.17925	0.184843	0	16.1929
	IpaDur1-S9-Pl3	0.228833	0	0.166667	100	64.3939	98.8131	0	0.235849	0	0.387597	26.4226
	IpaDur1-S10-Pl1	0	0	0	100	0	27.003	0	0	0.184843	0	12.7188
	IpaDur1-S10-Pl2	0.228833	0.30581	0	100	85.2273	32.9377	0	0.353774	0.184843	0.581395	21.982
	IpaDur1-S10-Pl3	0.228833	0.30581	0	100	0	27.003	0	0	0	0.193798	12.7731
	Average/chr	0.0427009	1.85814	1.43295	42.7354	12.143	16.0187	6.50001	0.474591	0.71439	0.0866993
